# Supplementary material for: Impacts of Chromatin States and Long-Range Genomic Segments on Aging and DNA Methylation
Source: PubMed Central journal article supplement (PMC4475080; doi:10.1371/journal.pone.0128517), 2015-06-19
Supplement: pone.0128517.s001.pdf [file pone.0128517.s001.pdf]

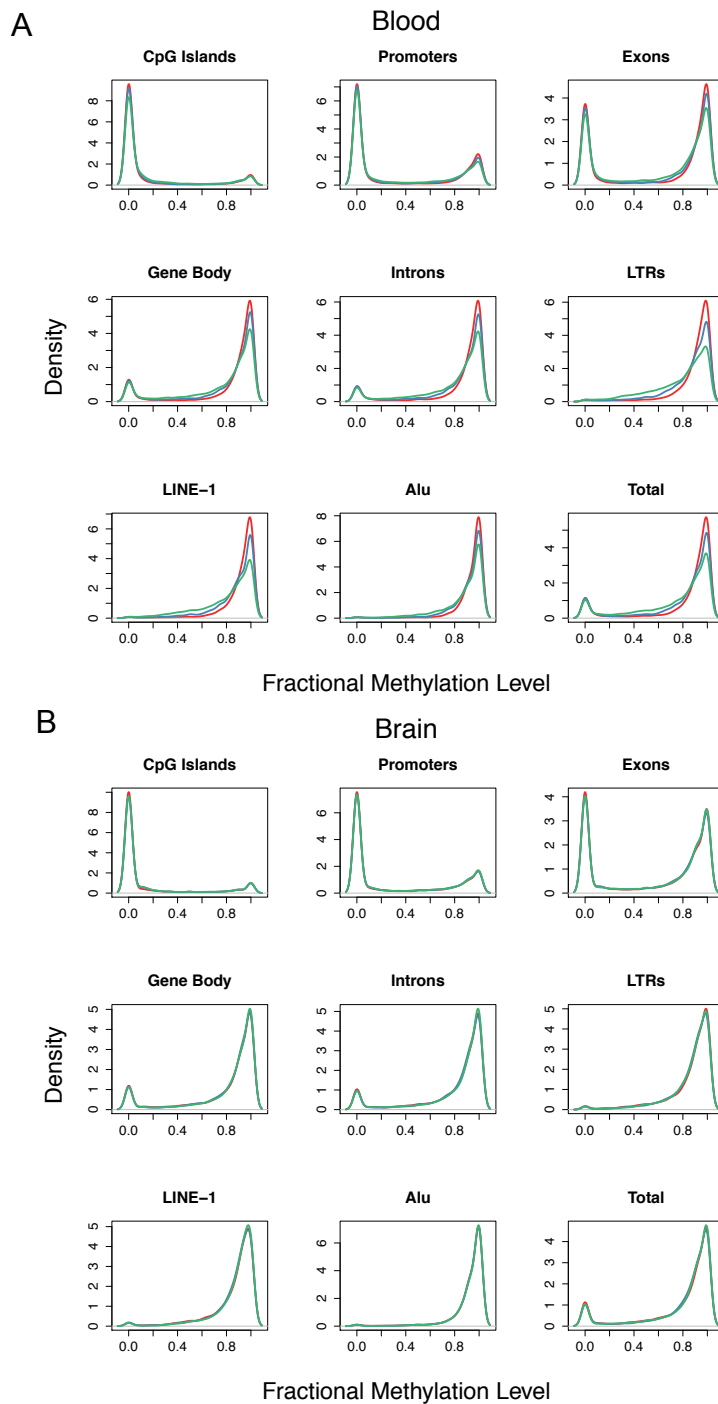

**S1 Fig.** CpG methylation level distribution in different genomic regions (A) in blood (B) in brain. In both tissues, data from three individuals are shown. For blood, a newborn (red), a 26-year old (blue), and a centenarian. For brain, a newborn (red), a 25-year old (blue) and an 82-year old (green).
