# Supplementary material for: Impacts of Chromatin States and Long-Range Genomic Segments on Aging and DNA Methylation
Source: PubMed Central journal article supplement (PMC4475080; doi:10.1371/journal.pone.0128517), 2015-06-19
Supplement: pone.0128517.s003.pdf [file pone.0128517.s003.pdf]

A

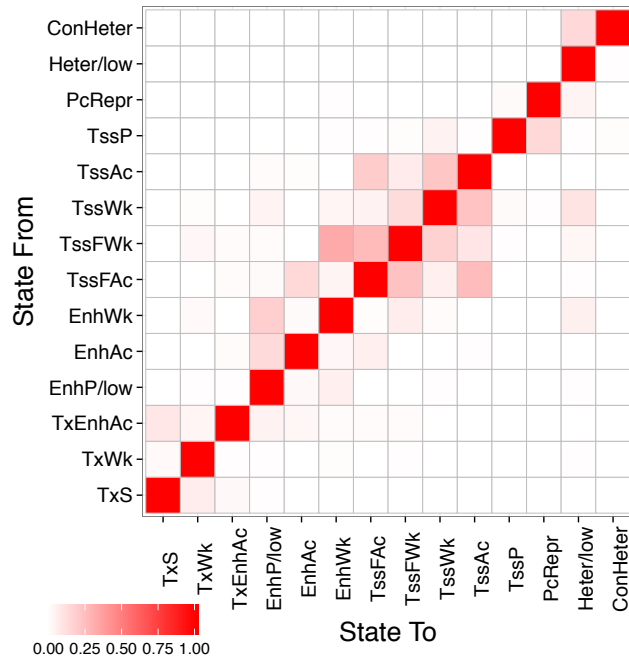

B

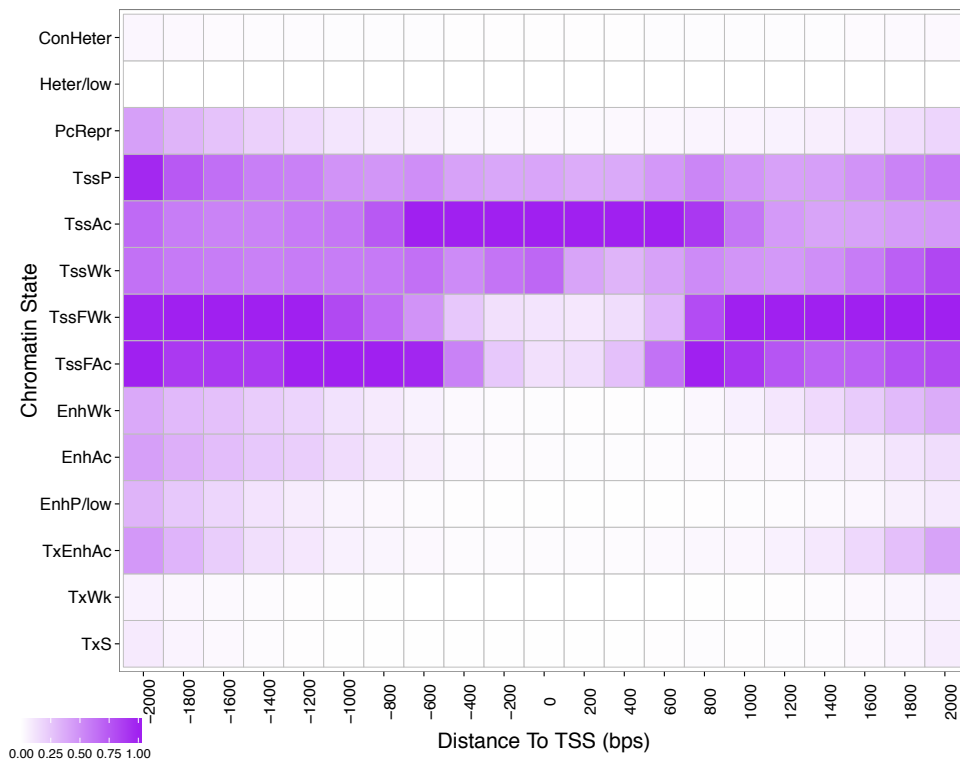

**S3 Fig.** Supporting matrices for the 14 chromatin states map of brain. (A) The transition probability matrix indicating the probabilities of each 200-bp (bin size) region switching from one state to another. (B) The probability matrix representing the probabilities of each 200-bp (bin size) region to be within 2kb (upstream and downstream) of the transcription start sites.
