# Supplementary material for: Impacts of Chromatin States and Long-Range Genomic Segments on Aging and DNA Methylation
Source: PubMed Central journal article supplement (PMC4475080; doi:10.1371/journal.pone.0128517), 2015-06-19
Supplement: pone.0128517.s004.pdf [file pone.0128517.s004.pdf]

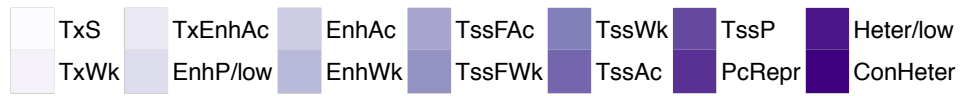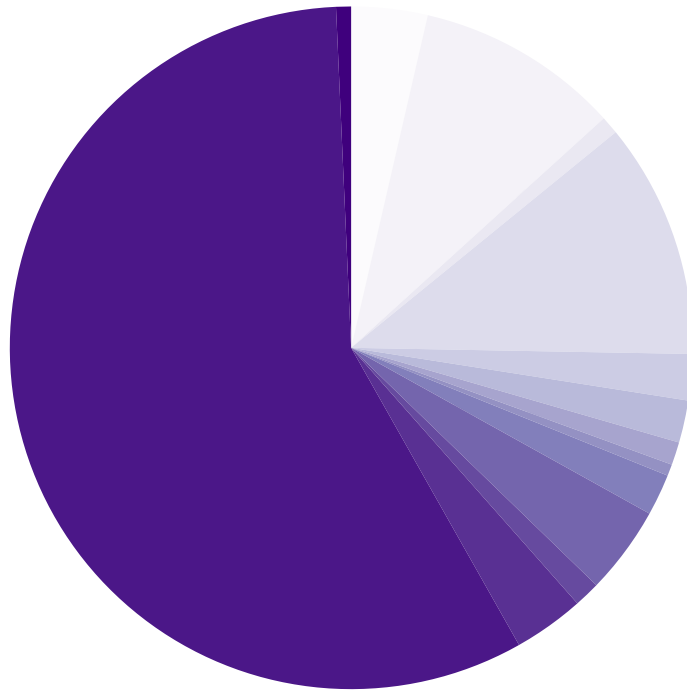

**S4 Fig.** The proportions of CpG sites in the whole genome belonging to each chromatin state. Heter/low makes up the highest percentage (57.48%) of the whole genome.
