# Supplementary material for: Impacts of Chromatin States and Long-Range Genomic Segments on Aging and DNA Methylation
Source: PubMed Central journal article supplement (PMC4475080; doi:10.1371/journal.pone.0128517), 2015-06-19
Supplement: pone.0128517.s006.pdf [file pone.0128517.s006.pdf]

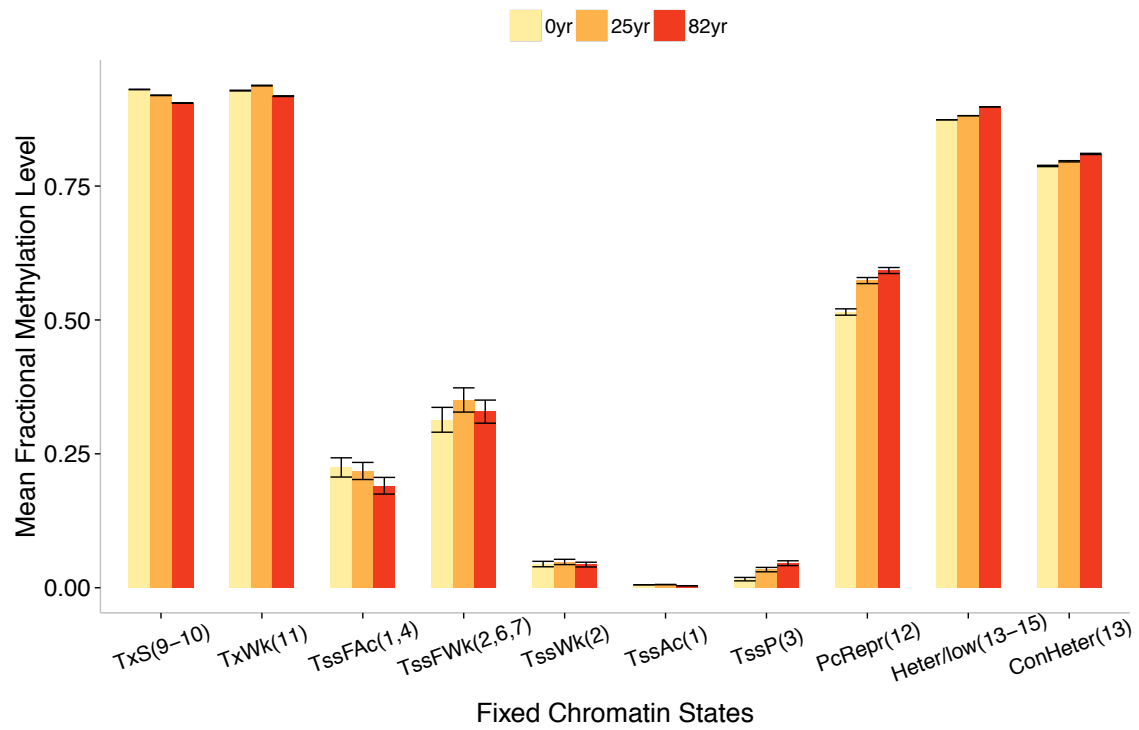

**S6 Fig.** DNA methylation levels across three ages in regions that have fixed chromatin states in 9 different cell lines from Ernst et al. (2011). The correspondent state numbers from Ernst et al. (2011) are shown in parentheses.
