# Supplementary material for: Impacts of Chromatin States and Long-Range Genomic Segments on Aging and DNA Methylation
Source: PubMed Central journal article supplement (PMC4475080; doi:10.1371/journal.pone.0128517), 2015-06-19
Supplement: pone.0128517.s007.pdf [file pone.0128517.s007.pdf]

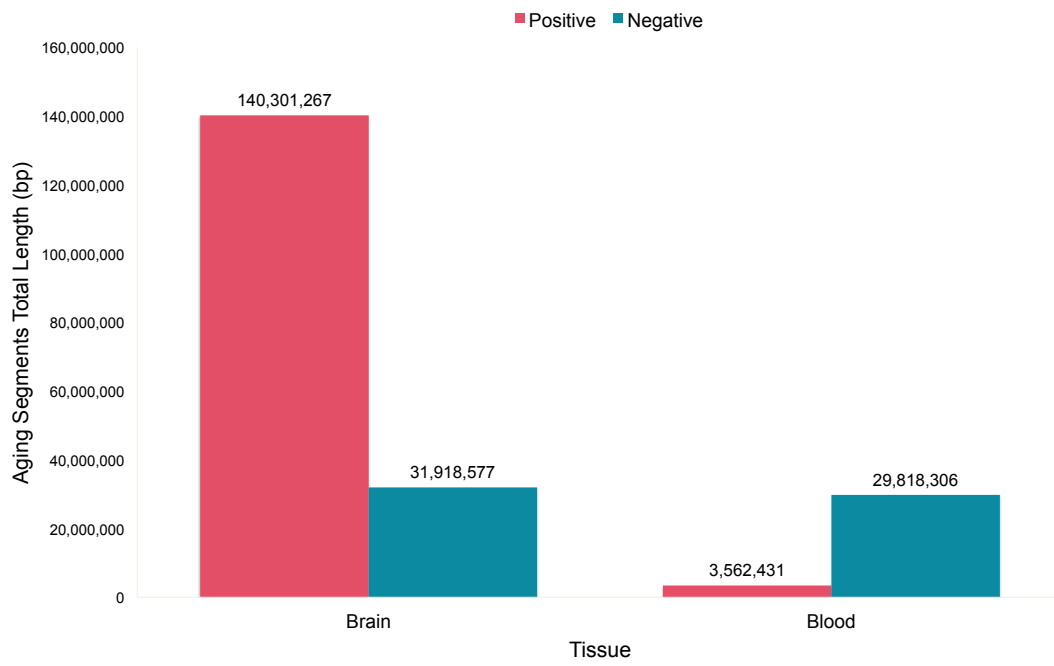

**S7 Fig.** Total lengths of positive and negative aging segments in brain and blood.
