# Supplementary material for: Impacts of Chromatin States and Long-Range Genomic Segments on Aging and DNA Methylation
Source: PLOS journal article supplement (doi:10.1371/journal.pone.0128517), 2015-06-19
Supplement: S5 (10.1371/journal.pone.0128517.s005) [file journal.pone.0128517.s005]

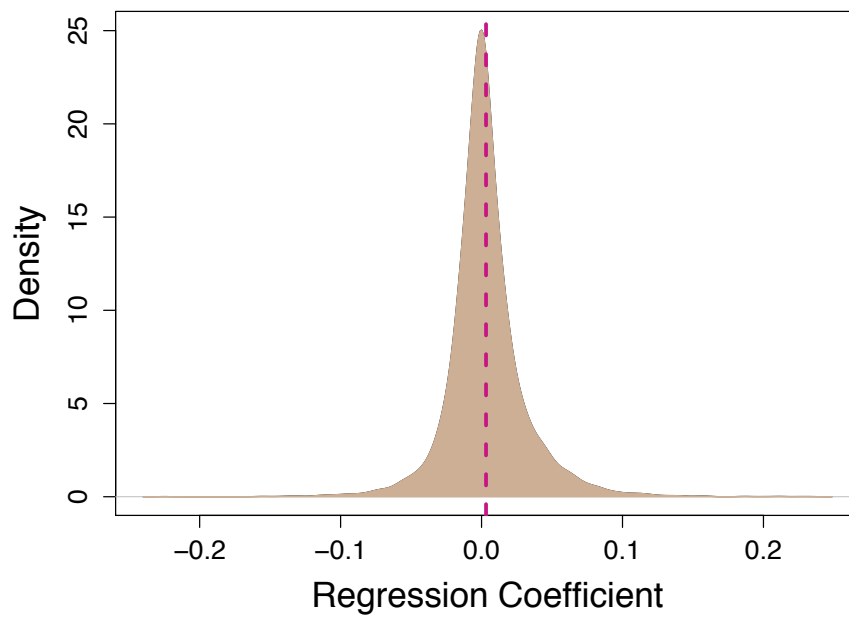

**S5 Fig.** Distribution of regression coefficients from the linear model of aging and DNA methylation in the brain data set. They range between -0.142 and 0.198.
